# Supplementary material for: Non-Lethal Detection of Frog Virus 3-Like (RUK13) and Common Midwife Toad Virus-Like (PDE18) Ranaviruses in Two UK-Native Amphibian Species
Source: MDPI journal article supplement (doi:10.3390/v14122635), 2022-11-25
Supplement: s1 [file s1]

## Supplementary information

**Table S1.** Clinical signs of ranavirosis. A list of clinical signs of ranavirosis that were watched for throughout this study as well as humane end-point checks considered in the thesis by Brookes, 2022 (Brookes, 2022).

| Sign                            | Description                                                                                                                                                                                                                                                                                                                                                                                                                                                                                                                                                                                                                                                                                                                                                           |
|---------------------------------|-----------------------------------------------------------------------------------------------------------------------------------------------------------------------------------------------------------------------------------------------------------------------------------------------------------------------------------------------------------------------------------------------------------------------------------------------------------------------------------------------------------------------------------------------------------------------------------------------------------------------------------------------------------------------------------------------------------------------------------------------------------------------|
| <i>Ranavirosis</i>              |                                                                                                                                                                                                                                                                                                                                                                                                                                                                                                                                                                                                                                                                                                                                                                       |
| Oedema                          | The physical appearance of an enlarged area, with tightening of the skin increasing with an increase severity of oedema. Caused by excess fluid acclimating under the skin. Area affected is specific to the anatomy: -dermis around the mandible (offered referred to as lips), floor of oral cavity, dermis around the eye, and broader areas such as the abdomen, drink patch, upper front limbs and upper hindlimbs, digits and cloaca. Blood vesicles will be constricted by the increasing fluid under the skin and will be contributed, appearing bright red. The area affected by oedema may appear both rigid and floppy dependent on where the oedema is. The presence of the fluid can be confirmed by a physical exam or by histopathological assessment. |
| Tremors                         | When the amphibian's muscles are in spasm, overtly clear in the hind limbs and sometimes eyes and muscles around the face. Can last for a few seconds and each recovery and new event recorded separately.                                                                                                                                                                                                                                                                                                                                                                                                                                                                                                                                                            |
| Swelling                        | Inflammation of a localised area, appearing as a small bump in a part of an individual's external appearance. Will disappear with the reversal of the inflammatory response and can be manipulated on an individual's exterior.                                                                                                                                                                                                                                                                                                                                                                                                                                                                                                                                       |
| Erythema                        | Can appear on any part of the body<br>The skin appears with generalised reddened skin caused by increased blood flow and vessel congestion in the skin or mucous membranes.                                                                                                                                                                                                                                                                                                                                                                                                                                                                                                                                                                                           |
| Haemorrhage                     | Can appear on any part of the body<br><b>Petechiae:</b> bleeding into the skin/tissue and gives the appearance of tiny red dots, that can be seen on their own or in clusters.<br><b>Ecchymosis:</b> Bleeding occurs as a result of blood vessels. Gives the appearance of a large bruise.                                                                                                                                                                                                                                                                                                                                                                                                                                                                            |
| Lethargic/laboured movements    | <b>Generalised:</b> Slowed, infrequent and/or abnormal movements and other behaviours performed abnormally, slowly and less frequently than unaffected animals. Reduced use of space, with possibly a reduction in the normal physical range of movement.<br><b>Laboured hopping/jumping</b><br><b>Laboured walking</b>                                                                                                                                                                                                                                                                                                                                                                                                                                               |
| Emaciation                      | When an animal loses weight (and in the absence of being weighed, when an individual shrink's in appearance with a decrease in a scored body condition but with no change in length of growth stage).                                                                                                                                                                                                                                                                                                                                                                                                                                                                                                                                                                 |
| Lack of appetite                | Includes the defined use of 'anorexia', which infers a physiological element Summarised, as an individual showing no attempt to seek out food when offered and/or by the weight/quantity of leftover food (those sizable to ingest).                                                                                                                                                                                                                                                                                                                                                                                                                                                                                                                                  |
| <i>Humane end-point checks:</i> |                                                                                                                                                                                                                                                                                                                                                                                                                                                                                                                                                                                                                                                                                                                                                                       |
| Apathy                          | <b>General:</b> A lack of enthusiasm or interest.<br><b>Delay or loss of hop reflex</b><br><b>Decrease in activity</b><br><b>Loss or decrease in antipredator response</b><br><b>Loss of aggressive behaviour</b><br><b>A loss of a startle response</b><br><b>Reduced responsiveness to being handled</b><br><b>Obtunded</b>                                                                                                                                                                                                                                                                                                                                                                                                                                         |
| Poor righting reflex            | When inverted: i) fails to place all four limbs back on the ground and support its own body weight; ii) laboured righting attempts, often with hind limbs extended and uncoordinated limb movements; iii) marked decrease in reaction to inversion/increase in reaction time when inverted, effects increasing with each invert. Tested 3 times.                                                                                                                                                                                                                                                                                                                                                                                                                      |
| Uncoordinated                   | Loss of balance and/or coordination during locomotion (walk, hop, climb) and unusual and slow eye movements, lacking in focus. Can also affect feeding behaviours, with difficulty focusing on food, may result in less successful strike for post-metamorphic or land-based amphibians. Behaviour is usually unchanged when overtly stimulated.                                                                                                                                                                                                                                                                                                                                                                                                                      |

**Table S2.** Detection of RUK13 in *R. temporaria* at day 2, 4, and 6 post-exposure using quantitative PCR (qPCR) for samples obtained pre and post-euthanasia. Positive (+), negative (-), sample not done (ND).

|                        | No. of days post-infection |             |                   |                   |                   |                   |                   |             |             |      |             |             |
|------------------------|----------------------------|-------------|-------------------|-------------------|-------------------|-------------------|-------------------|-------------|-------------|------|-------------|-------------|
|                        | Day 2                      |             |                   |                   | Day 4             |                   |                   |             | Day 6       |      |             |             |
|                        | Control                    | Low         | Medium            | High              | Control           | Low               | Medium            | High        | Control     | Low  | Medium      | High        |
| <b>Swab</b>            |                            |             |                   |                   |                   |                   |                   |             |             |      |             |             |
| <i>Pre-death</i>       | 7(-)                       |             |                   |                   | 1(+), 6(-)        |                   |                   |             | 7(-)        |      |             |             |
| <i>Buccal</i>          | 6(-), 1(ND)                | 7(-)        | 3(+), 4(-)        | 6(+), 1(-)        | 6(-), 1(ND)       | 4(+), 3(-)        | 7(+)              | 7(+)        | 6(-), 1(ND) | 7(-) | 7(+)        | 7(+)        |
| <i>Digits</i>          |                            | 7(-)        | 7(-)              | 6(+), 1(-)        |                   | 2(+), 5(-)        | 6(+), 1(-)        | 7(+)        |             | 7(-) | 7(+)        | 7(+)        |
| <i>Body</i>            |                            | 7(-)        | 1(+), 6(-)        | 6(+), 1(-)        |                   | 2(+), 5(-)        | 6(+), 1(-)        | 5(+), 2(-)  |             | 7(-) | 7(+)        | 7(+)        |
| <i>Environment</i>     | 7(-)                       | 7(-)        | 5(+), 2(-)        | 7(+)              | 7(-)              | 7(-)              | 6(+), 1(-)        | 7(+)        | 7(-)        | 7(-) | 5(+), 2(-)  | 7(+)        |
| <b>Stool</b>           | 4(-), 3(ND)                | 2(-), 5(ND) | 2(+), 5(ND)       | (1+), 1(-), 5(ND) | 1(+), 5(-), 1(ND) | 1(+), 5(-), 1(ND) | 6(+), 1(-)        | 6(+), 1(ND) | 7(-)        | 7(-) | 6(+), 1(-)  | 7(+)        |
| <b>Toe clip</b>        |                            | 7(-)        | 7(-)              | 7(-)              |                   | 7(-)              | 6(+), 1(-)        | 4(+), 3(-)  |             | 7(-) | 6(+), 1(-)  | 7(+)        |
| <b>Liver</b>           | 7(-)                       | 7(-)        | 1(+), 6(-)        | 3(+), 4(-)        | 7(-)              | 4(+), 3(-)        | 7(+)              | 6(+), 1(-)  | 7(-)        | 7(-) | 7(+)        | 7(+)        |
| <b>Kidney</b>          |                            | 6(-), 1(ND) | 1(+), 6(-)        | 1(+), 6(-)        |                   | 3(+), 4(-)        | 7(+)              | 6(+), 1(-)  |             | 7(-) | 6(+), 1(-)  | 7(+)        |
| <b>Brain</b>           | 1(-), 6(ND)                | 7(-)        | 7(-)              | 2(+), 5(-)        | 1(-), 6(ND)       | 2(+), 5(-)        | 5(+), 2(-)        | 5(+), 2(-)  | 1(-), 6(ND) | 7(-) | 6(+), 1(-)  | 7(+)        |
| <b>GIT</b>             | 1(-), 6(ND)                | 7(-)        | 7(+)              | 6(+), 1(-)        | 1(-), 6(ND)       | 5(+), 2(-)        | 7(+)              | 7(+)        | 1(-), 6(ND) | 7(-) | 7(+)        | 7(+)        |
| <b>Gall bladder</b>    |                            | 6(-), 1(ND) | 6(-), 1(ND)       | 7(-)              |                   | 1(+), 6(-)        | 4(+), 2(-), 1(ND) | 5(+), 2(-)  |             | 7(-) | 4(+), 3(ND) | 6(+), 1(ND) |
| <b>Heart</b>           | 1(-), 6(ND)                | 7(-)        | 1(+), 6(-)        | 1(+), 6(-)        | 1(-), 6(ND)       | 1(+), 6(-)        | 6(+), 1(-)        | 6(+), 1(-)  | 1(-), 6(ND) | 7(-) | 6(+), 1(-)  | 7(+)        |
| <b>Lungs</b>           | 1(-), 6(ND)                | 7(-)        | 1(+), 6(-)        | 4(+), 3(-)        | 1(-), 6(ND)       | 3(+), 4(-)        | 7(+)              | 5(+), 2(-)  | 1(-), 6(ND) | 7(-) | 6(+), 1(-)  | 7(+)        |
| <b>Leg</b>             | 1(-), 6(ND)                | 7(-)        | 7(-)              | 7(-)              | 1(-), 6(ND)       | 2(+), 5(-)        | 7(+)              | 6(+), 1(-)  | 1(-), 6(ND) | 7(-) | 6(+), 1(-)  | 7(+)        |
| <b>Spleen/Pancreas</b> | 1(-), 6(ND)                | 7(-)        | 1(+), 1(-), 5(ND) | 3(+), 4(-)        | 1(-), 6(ND)       | 2(+), 5(-)        | 7(+)              | 7(+)        | 1(-), 6(ND) | 7(-) | 7(+)        | 7(+)        |
| <b>Large Intestine</b> | 1(-), 6(ND)                | 7(-)        | 2(+), 5(-)        | 5(+), 2(-)        | 1(-), 6(ND)       | 3(+), 4(-)        | 6(+), 1(-)        | 7(+)        | 1(-), 6(ND) | 7(-) | 6(+), 1(-)  | 7(+)        |

**Table S3.** Sample type performance in *R. temporaria*. The performance of each sample type across all three sampling days and treatments in frogs using: test sensitivity and specificity and the rate of false negatives ( $\beta$ ) and false positives ( $\alpha$ ).

|                 | % detectability | Sensitivity (%) | Specificity (%) | $\alpha$ (false +ve) % | $\beta$ (false -ve) % |
|-----------------|-----------------|-----------------|-----------------|------------------------|-----------------------|
| <b>Swab</b>     |                 |                 |                 |                        |                       |
| <i>Buccal</i>   | 62              | 85              | 100             | 0                      | 15                    |
| <i>Digits</i>   | 56              | 76              | 100             | 0                      | 24                    |
| <i>Body</i>     | 57              | 78              | 100             | 0                      | 22                    |
| <i>Tank</i>     | 59              | 80              | 100             | 0                      | 20                    |
| <b>Stool</b>    | 44              | 78              | 100             | 0                      | 22                    |
| <b>Toe clip</b> | 41              | 57              | 100             | 0                      | 43                    |

  

|                         | % detectability | Sensitivity (%) | Specificity (%) | $\alpha$ (false +ve) % | $\beta$ (false -ve) % |
|-------------------------|-----------------|-----------------|-----------------|------------------------|-----------------------|
| Liver                   | 56              | 76              | 100             | 0                      | 24                    |
| Brain                   | 43              | 59              | 100             | 0                      | 39                    |
| Gastro-intestinal tract | 71              | 98              | 94              | 6                      | 2                     |
| Gall bladder            | 32              | 50              | 100             | 0                      | 50                    |
| Kidney                  | 52              | 72              | 100             | 0                      | 25                    |
| Heart                   | 44              | 61              | 100             | 0                      | 37                    |
| Lungs                   | 52              | 72              | 100             | 0                      | 25                    |
| Leg                     | 44              | 61              | 100             | 0                      | 37                    |
| Spleen/Pancreas         | 54              | 76              | 100             | 0                      | 21                    |
| Large Intestine         | 57              | 78              | 100             | 0                      | 19                    |

**Table S4.** Detection of RUK13 and PDE18 in *B.bufo* at day 4, 6, and 8 post-exposure using quantitative PCR (qPCR) for samples obtained pre and post-euthanasia. Positive (+), negative (-), sample not done (ND).

|               | Day 4      |            |            | Day 6       |            |             | Day 8       |             |             |
|---------------|------------|------------|------------|-------------|------------|-------------|-------------|-------------|-------------|
|               | Control    | PDE18      | RUK13      | Control     | PDE18      | RUK13       | Control     | PDE18       | RUK13       |
| <b>Swab</b>   |            |            |            |             |            |             |             |             |             |
| <i>Tank</i>   | 1(+), 2(-) | 1(+), 6(-) | 1(+), 6(-) | 3(-)        | 7(-)       | 7(N)        | 3(-)        | 1(+), 6(-)  | 7(-)        |
| <i>Digit</i>  | 1(+), 2(-) | 1(+), 6(-) | 3(+), 4(-) | 3(-)        | 7(-)       | 1(+), 6(-)  | 3(-)        | 1(+), 6(-)  | 1(+), 6(-)  |
| <i>Buccal</i> | 1(+), 2(-) | 2(+), 5(-) | 5(+), 2(-) | 3(-)        | 2(+), 5(-) | 5(+), 2(-)  | 3(-)        | 5(+), 2(-)  | 7(+)        |
| <b>Stool</b>  | 3(ND)      | 7(ND)      | 7(ND)      | 1(-), 2(ND) | 7(ND)      | 5(-), 2(ND) | 1(-), 2(ND) | 1(-), 6(ND) | 1(-), 6(ND) |
| <b>Liver</b>  | 3(-)       | 7(-)       | 7(-)       | 3(-)        | 7(-)       | 1(+), 6(-)  | 3(-)        | 4(+), 3(-)  | 1(+), 6(-)  |
| <b>GIT</b>    | 1(+), 2(-) | 7(-)       | 7(-)       | 3(-)        | 3(+), 4(-) | 2(+), 5(-)  | 3(-)        | 2(+), 5(-)  | 2(+), 5(-)  |
| <b>Leg</b>    | 3(-)       | 7(-)       | 1(+), 6(-) | 3(-)        | 7(-)       | 2(+), 5(-)  | 3(-)        | 2(+), 5(-)  | 7(-)        |

**Table S5.** Generalised Linear Mixed effects model output for *R. temporaria* (Outcome ~ Sample + Day + Dose + (1|Frog)) p-values for fixed effects and their interactions with detectability. An effect is deemed significant if p-value is <0.05.

| Fixed effect | -                       | -               | p value |
|--------------|-------------------------|-----------------|---------|
| Dose         | Low                     | Medium          | <0.0001 |
|              |                         | High            | <0.0001 |
|              | Medium                  | High            | 0.6046  |
| Day          | 2                       | 4               | <0.0001 |
|              |                         | 6               | <0.0001 |
|              | 4                       | 6               | 1       |
| Sample       | Buccal                  | Brain           | 0.0221  |
|              |                         | Gall bladder    | 0.0005  |
|              |                         | Toe clip        | 0.0066  |
|              | Digits                  | Gall bladder    | 0.0454  |
|              | Body                    | Gall bladder    | 0.0159  |
|              | Brain                   | GIT             | <.0001  |
|              | Gastro-intestinal tract | Gall bladder    | <.0001  |
|              |                         | Heart           | <.0001  |
|              |                         | Kidney          | 0.007   |
|              |                         | Leg             | <.0001  |
|              |                         | Lung            | 0.007   |
|              |                         | Spleen/pancreas | 0.0262  |
|              |                         | Stool           | 0.0108  |
|              |                         | Toe             | <.0001  |
|              | Gall bladder            | Large Intestine | 0.0159  |
|              |                         | Liver           | 0.0454  |
|              |                         | Tank            | 0.0053  |

**Table S6.** Zero-inflated Gaussian Mixed effects model output for viral load in *R. temporaria* (Load ~ Tissue\*Dose\*Day + (1|Frog)) p-values for fixed effects and their interactions with viral load of tissues. An effect is deemed significant if p-value is <0.05.

| Fixed effect | -                        | -                        | p value |
|--------------|--------------------------|--------------------------|---------|
| Day          | 2                        | 4                        | <0.0001 |
|              |                          | 6                        | <0.0001 |
| Dose         | 4                        | 6                        | 0.0227  |
|              | Low                      | Medium                   | <0.0001 |
|              |                          | High                     | <0.0001 |
| Organ        | Medium                   | High                     | 0.0006  |
|              |                          | GIT                      | <.0001  |
|              | Brain                    | Lung                     | 0.0001  |
|              |                          | GIT                      | <.0001  |
|              | Gall bladder             | Lung                     | 0.0003  |
|              |                          | Heart                    | 0.0008  |
|              | GIT                      | Kidney                   | 0.0001  |
|              |                          | Leg                      | 0.0001  |
|              |                          | LI                       | 0.0021  |
|              |                          | Liver                    | <0.0001 |
|              |                          | Spleen/pancreas          | 0.002   |
|              |                          | Toe                      | <0.0001 |
|              | Heart                    | Toe                      | 0.0354  |
|              | LI                       | Toe                      | 0.0052  |
|              | Lung                     | Toe                      | <0.0001 |
|              | Spleen/pancreas          | Toe                      | 0.0092  |
| Day*Dose     | Day 4 - Low              | Day 4 - Medium           | 0.0228  |
|              |                          | Day 4 - High             | 0.0468  |
|              | Day 6 - Low              | Day 6 - Medium           | <0.0001 |
|              |                          | Day 6 - High             | <0.0001 |
|              | Day 2 - Medium           | Day 4 - Medium           | 0.0015  |
|              |                          | Day 6 - Medium           | 0.0003  |
|              | Day 6 - Medium           | Day 6 - High             | <0.0001 |
|              |                          | Day 4 - High             | 0.0371  |
|              | Day 2 - High             | Day 6 - High             | <0.0001 |
|              |                          | Day 6 - High             | <0.0001 |
|              | Day 4 - High             | Day 6 - High             | <0.0001 |
|              |                          | Medium - GIT             | <0.0001 |
| Dose*Organ   | Medium - Brain           | Medium - Kidney          | 0.019   |
|              |                          | Medium - LI              | 0.0205  |
|              |                          | Medium - Lung            | <0.0001 |
|              |                          | Medium - Spleen/pancreas | 0.0206  |
|              | Medium - GB              | Medium - GIT             | 0.0001  |
|              |                          | Medium - Lung            | 0.0028  |
|              | Medium - GIT             | Medium - Heart           | 0.008   |
|              |                          | Medium - Kidney          | 0.0096  |
|              |                          | Medium - Liver           | <0.0001 |
|              |                          | Medium - Toe             | <0.0001 |
|              | Medium - Kidney          | Medium - Toe             | 0.0385  |
|              |                          | Medium - Lung            | 0.0071  |
|              | Medium - LI              | Medium - Toe             | <0.0001 |
|              |                          | Medium - Toe             | 0.0399  |
|              | Medium - Lung            | High - GIT               | <0.0001 |
|              |                          | High - Lung              | 0.0027  |
|              | Medium - Spleen/pancreas | High - GIT               | <0.0001 |
|              |                          | High - Heart             | <0.0001 |
|              | High - Brain             | High - Kidney            | <0.0001 |
|              |                          | High - Leg               | <0.0001 |
|              | High - GB                | High - LI                | <0.0001 |
|              |                          | High - Liver             | <0.0001 |
|              | High - GIT               | High - Lung              | <0.0001 |
|              |                          | High - Spleen/pancreas   | <0.0001 |
|              |                          | High - Toe               | <0.0001 |
|              | High - LI                | High - Lung              | <0.0001 |
|              |                          | High - Lung              | 0.015   |
|              | High - Liver             | High - Toe               | <0.0001 |
|              |                          | High - Toe               | 0.0002  |

| Fixed effect | -                       | -                       | p value |
|--------------|-------------------------|-------------------------|---------|
| Organ*Day    | Day 2 - GB              | Day 6 - GB              | 0.0005  |
|              | Day 2 - GIT             | Day 4 - GIT             | <0.0001 |
|              |                         | Day 6 - GIT             | 0.002   |
|              | Day 2 - Heart           | Day 4 - Heart           | 0.0039  |
|              |                         | Day 6 - Heart           | 0.0001  |
|              | Day 2 - Kidney          | Day 4 - Kidney          | 0.0222  |
|              |                         | Day 6 - Kidney          | 0.0003  |
|              | Day 2 - Leg             | Day 4 - Leg             | 0.0032  |
|              |                         | Day 6 - Leg             | <0.0001 |
|              | Day 2 - LI              | Day 6 - LI              | 0.0084  |
|              | Day 2 - Liver           | Day 4 - Liver           | <0.0001 |
|              |                         | Day 6 - Liver           | <0.0001 |
|              | Day 2 - Lung            | Day 6 - Lung            | 0.0321  |
|              | Day 2 - Spleen/pancreas | Day 6 - Spleen/pancreas | 0.0031  |
|              | Day 2 - Toe             | Day 6 - Toe             | 0.0055  |
|              | Day 4 - Brain           | Day 4 - GIT             | <0.0001 |
|              |                         | Day 4 - Heart           | 0.0003  |
|              |                         | Day 4 - Kidney          | 0.002   |
|              |                         | Day 4 - Leg             | 0.0043  |
|              |                         | Day 4 - Liver           | <0.0001 |
|              |                         | Day 4 - Lung            | <0.0001 |
|              | Day 4 - GB              | Day 4 - GIT             | <0.0001 |
|              |                         | Day 4 - Lung            | 0.0091  |
|              | Day 4 - GIT             | Day 4 - Heart           | <0.0001 |
|              |                         | Day 4 - Kidney          | <0.0001 |
|              |                         | Day 4 - Leg             | <0.0001 |
|              |                         | Day 4 - LI              | <0.0001 |
|              |                         | Day 4 - Liver           | <0.0001 |
|              |                         | Day 4 - Spleen/pancreas | <0.0001 |
|              |                         | Day 4 - Toe             | <0.0001 |
|              | Day 4 - Heart           | Day 4 - Toe             | 0.0016  |
|              | Day 4 - Kidney          | Day 4 - Toe             | 0.0118  |
|              | Day 4 - Leg             | Day 4 - Toe             | 0.0147  |
|              | Day 4 - Liver           | Day 4 - Toe             | 0.0001  |
|              | Day 4 - Lung            | Day 4 - Toe             | <0.0001 |

| Fixed effect   | -                              | -                                 | p value |
|----------------|--------------------------------|-----------------------------------|---------|
| Organ Day Dose | Day 4 - Low<br>Brain           | Day 4 - Low<br>GIT                | <0.0001 |
|                | Day 4 - Low<br>GB              | Day 4 - Low<br>GIT                | <0.0001 |
|                |                                | Day 4 - Low<br>Lung               | 0.0076  |
|                | Day 4 - Low<br>GIT             | Day 4 - Low<br>Kidney             | 0.0003  |
|                |                                | Day 4 - Low<br>Leg                | 0.0001  |
|                |                                | Day 4 - Low<br>LI                 | <0.0001 |
|                |                                | Day 4 - Low<br>Liver              | 0.0001  |
|                |                                | Day 4 - Low<br>Spleen/pancreas    | 0.0001  |
|                |                                | Day 4 - Low<br>Toe                | 0.0128  |
|                | Day 2 - Medium<br>Kidney       | Day 2 - Medium<br>Lung            | 0.0007  |
|                | Day 2 - Medium<br>LI           | Day 2 - Medium<br>Liver           | 0.008   |
|                | Day 2 - Medium<br>Liver        | Day 2 - Medium<br>Lung            | <0.0001 |
|                |                                | Day 2 - Medium<br>Spleen/pancreas | 0.0005  |
|                | Day 4 - Medium<br>Brain        | Day 4 - Medium<br>GIT             | <0.0001 |
|                |                                | Day 4 - Medium<br>Heart           | 0.0275  |
|                |                                | Day 4 - Medium<br>Kidney          | 0.0003  |
|                |                                | Day 4 - Medium<br>Leg             | 0.0002  |
|                |                                | Day 4 - Medium<br>LI              | 0.0002  |
|                |                                | Day 4 - Medium<br>Liver           | <0.0001 |
|                |                                | Day 4 - Medium<br>Lung            | <0.0001 |
|                |                                | Day 4 - Medium<br>Spleen/pancreas | 0.018   |
|                | Day 4 - Medium<br>Gall bladder | Day 4 - Medium<br>GIT             | 0.0012  |
|                |                                | Day 4 - Medium<br>Toe             | 0.0026  |
|                | Day 4 - Medium<br>GIT          | Day 4 - Medium<br>Heart           | 0.0002  |
|                |                                | Day 4 - Medium<br>Kidney          | 0.0058  |
|                |                                | Day 4 - Medium<br>Leg             | 0.0119  |
|                |                                | Day 4 - Medium<br>LI              | 0.0425  |
|                |                                | Day 4 - Medium<br>Spleen/pancreas | 0.0001  |
|                |                                | Day 4 - Medium<br>Toe             | <0.0001 |
|                | Day 4 - Medium<br>Heart        | Day 4 - Medium<br>Toe             | 0.0002  |
|                | Day 4 - Medium<br>Kidney       | Day 4 - Medium<br>Toe             | <0.0001 |
|                | Day 4 - Medium<br>Leg          | Day 4 - Medium<br>Toe             | <0.0001 |
|                | Day 4 - Medium<br>LI           | Day 4 - Medium<br>Toe             | <0.0001 |
|                | Day 4 - Medium<br>Liver        | Day 4 - Medium<br>Toe             | <0.0001 |



| Fixed effect   | -                              | -                              | p value |
|----------------|--------------------------------|--------------------------------|---------|
| Organ Day Dose | Day 4 - Medium Lung            | Day 4 - Medium Toe             | <0.0001 |
|                | Day 4 - Medium Spleen/pancreas | Day 4 - Medium Toe             | 0.0001  |
|                | Day 6 - Medium Brain           | Day 6 - Medium GIT             | <0.0001 |
|                |                                | Day 6 - Medium Heart           | 0.0158  |
|                |                                | Day 6 - Medium Kidney          | <0.0001 |
|                |                                | Day 6 - Medium Leg             | <0.0001 |
|                |                                | Day 6 - Medium Liver           | <0.0001 |
|                |                                | Day 6 - Medium Lung            | 0.0008  |
|                |                                | Day 6 - Medium Spleen/pancreas | 0.0418  |
|                | Day 6 - Medium Gall bladder    | Day 6 - Medium GIT             | <0.0001 |
|                |                                | Day 6 - Medium Kidney          | <0.0001 |
|                |                                | Day 6 - Medium Leg             | 0.001   |
|                |                                | Day 6 - Medium Liver           | <0.0001 |
|                |                                | Day 6 - Medium Lung            | 0.0125  |
|                | Day 6 - Medium GIT             | Day 6 - Medium Heart           | 0.0427  |
|                |                                | Day 6 - Medium LI              | 0.0019  |
|                |                                | Day 6 - Medium Spleen/pancreas | 0.0084  |
|                |                                | Day 6 - Medium Toe             | <0.0001 |
|                | Day 6 - Medium Kidney          | Day 6 - Medium LI              | 0.0137  |
|                | Day 6 - Medium Leg             | Day 6 - Medium Toe             | 0.0404  |
|                | Day 2 - High Brain             | Day 2 - High Liver             | 0.0007  |
|                | Day 2 - High Gall bladder      | Day 2 - High GIT               | 0.0045  |
|                | Day 2 - High GIT               | Day 2 - High Heart             | <0.0001 |
|                |                                | Day 2 - High Kidney            | 0.0342  |
|                |                                | Day 2 - High Leg               | 0.0045  |
|                |                                | Day 2 - High LI                | 0.0451  |
|                |                                | Day 2 - High Liver             | <0.0001 |
|                |                                | Day 2 - High Spleen/pancreas   | <0.0001 |
|                |                                | Day 2 - High Toe               | <0.0001 |
|                | Day 2 - High LI                | Day 2 - High Liver             | 0.0001  |
|                | Day 2 - High Liver             | Day 2 - High Lung              | 0.0003  |
|                | Day 4 - High Brain             | Day 4 - High GB                | 0.0414  |
|                |                                | Day 4 - High GIT               | <0.0001 |
|                |                                | Day 4 - High Heart             | 0.0052  |

| Fixed effect   | -                               | -                               | p value |
|----------------|---------------------------------|---------------------------------|---------|
| Organ Day Dose |                                 |                                 |         |
|                |                                 | Day 4 - High<br>Kidney          | 0.0057  |
|                |                                 | Day 4 - High<br>Leg             | 0.0001  |
|                |                                 | Day 4 - High<br>Liver           | <0.0001 |
|                |                                 | Day 4 - High<br>Lung            | 0.0002  |
|                |                                 | Day 4 - High<br>Spleen/pancreas | 0.0011  |
|                | Day 4 - High<br>Gall bladder    | Day 4 - High<br>GIT             | <0.0001 |
|                | Day 4 - High<br>GIT             | Day 4 - High<br>Heart           | <0.0001 |
|                |                                 | Day 4 - High<br>Kidney          | <0.0001 |
|                |                                 | Day 4 - High<br>Leg             | <0.0001 |
|                |                                 | Day 4 - High<br>LI              | <0.0001 |
|                |                                 | Day 4 - High<br>Liver           | <0.0001 |
|                |                                 | Day 4 - High<br>Lung            | <0.0001 |
|                |                                 | Day 4 - High<br>Spleen/pancreas | <0.0001 |
|                |                                 | Day 4 - High<br>Toe             | <0.0001 |
|                | Day 4 - High<br>LI              | Day 4 - High<br>Liver           | 0.0032  |
|                | Day 4 - High<br>Liver           | Day 4 - High<br>Toe             | <0.0001 |
|                | Day 4 - High<br>Lung            | Day 4 - High<br>Toe             | 0.0025  |
|                | Day 4 - High<br>Spleen/pancreas | Day 4 - High<br>Toe             | 0.017   |
|                | Day 6 - High<br>Brain           | Day 6 - High<br>GIT             | <0.0001 |
|                |                                 | Day 6 - High<br>Heart           | 0.0006  |
|                |                                 | Day 6 - High<br>Leg             | <0.0001 |
|                |                                 | Day 6 - High<br>LI              | 0.0001  |
|                |                                 | Day 6 - High<br>Lung            | <0.0001 |
|                |                                 | Day 6 - High<br>Spleen/pancreas | <0.0001 |
|                | Day 6 - High<br>Gall bladder    | Day 6 - High<br>Toe             | 0.0018  |
|                | Day 6 - High<br>GIT             | Day 6 - High<br>Kidney          | <0.0001 |
|                |                                 | Day 6 - High<br>Liver           | 0.0028  |
|                |                                 | Day 6 - High<br>Toe             | <0.0001 |
|                | Day 6 - High<br>Heart           | Day 6 - High<br>Kidney          | 0.0041  |
|                |                                 | Day 6 - High<br>Toe             | <0.0001 |
|                | Day 6 - High<br>Kidney          | Day 6 - High<br>Leg             | 0.0001  |
|                |                                 | Day 6 - High<br>LI              | 0.0011  |
|                |                                 | Day 6 - High<br>Lung            | <0.0001 |
|                |                                 | Day 6 - High<br>Spleen/pancreas | 0.0001  |

| Fixed effect   | -                               | -                     | p value |
|----------------|---------------------------------|-----------------------|---------|
| Organ Day Dose | Day 6 - High<br>Leg             | Day 6 - High<br>Liver | 0.0436  |
|                |                                 | Day 6 - High<br>Toe   | <0.0001 |
|                | Day 6 - High<br>Liver           | Day 6 - High<br>Lung  | 0.0074  |
|                | Day 6 - High<br>Lung            | Day 6 - High<br>Toe   | <0.0001 |
|                | Day 6 - High<br>Spleen/pancreas | Day 6 - High<br>Toe   | <0.0001 |

**Table S7.** Zero-inflated Gaussian Mixed effects model outputs for viral quantity during shedding in *R. temporaria* (Quantity ~ Sample\*Day\*Dose + (1|Frog)) p-values for fixed effects and their interactions with viral shedding in stool and tank swabs. An effect is deemed significant if p-value is <0.05.

| Fixed effect | -               | -               | p value |
|--------------|-----------------|-----------------|---------|
| Day          | 2               | 4               | <0.0001 |
|              |                 | 6               | <0.0001 |
| Dose         | Low             | Medium          | <0.0001 |
|              |                 | High            | <0.0001 |
|              | Medium          | High            | <0.0001 |
| Day*Dose     | Day 2 - Low     | Day 4 - Low     | <0.0001 |
|              |                 | Day 2 - Medium  | 0.0002  |
|              |                 | Day 2 - High    | <0.0001 |
|              | Day 4 - Low     | Day 4 - Medium  | 0.0005  |
|              |                 | Day 4 - High    | <0.0001 |
|              |                 | Day 6 - Low     | <0.0001 |
|              | Day 6 - Low     | Day 6 - Medium  | <0.0001 |
|              |                 | Day 6 - High    | <0.0001 |
|              | Day 2 - Medium  | Day 4 - Medium  | <0.0001 |
|              |                 | Day 6 - Medium  | <0.0001 |
|              |                 | Day 2 - High    | 0.0036  |
|              | Day 6 - Medium  | Day 6 - High    | 0.0457  |
|              | Day 2 - High    | Day 6 - High    | <0.0001 |
|              | Day 4 - High    | Day 6 - High    | 0.0295  |
| Sample   Day | Day 4 - GIT     | Day 4 - Body    | <0.0001 |
|              |                 | Day 4 - Digit   | <0.0001 |
|              |                 | Day 4 - Kidney  | 0.0009  |
|              |                 | Day 4 - Liver   | 0.0001  |
|              |                 | Day 4 - Stool   | <0.0001 |
|              |                 | Day 4 - Tank    | <0.0001 |
|              | Day 4 - Body    | Day 4 - Tank    | 0.0073  |
|              | Day 4 - Digit   | Day 4 - Stool   | 0.0085  |
|              |                 | Day 4 - Tank    | 0.0003  |
|              | Day 4 - Kidney  | Day 4 - Stool   | <0.0001 |
|              |                 | Day 4 - Tank    | <0.0001 |
|              | Day 4 - Liver   | Day 4 - Stool   | 0.0001  |
|              |                 | Day 4 - Tank    | <0.0001 |
|              | Day 6 - GIT     | Day 6 - Stool   | 0.0209  |
|              | Day 6 - Kidney  | Day 6 - Stool   | 0.0107  |
|              | Day 6 - Liver   | Day 6 - Stool   | 0.025   |
|              | Day 2 - Stool   | Day 4 - Stool   | 0.0009  |
| Dose*Sample  | Medium - Body   | Medium - GIT    | <0.0001 |
|              |                 | Medium - Kidney | 0.0099  |
|              | Medium - Digit  | Medium - GIT    | <0.0001 |
|              |                 | Medium - Kidney | 0.0002  |
|              |                 | Medium - Liver  | 0.0361  |
|              | Medium - GIT    | Medium - Liver  | 0.0486  |
|              |                 | Medium - Stool  | <0.0001 |
|              |                 | Medium - Tank   | <0.0001 |
|              | Medium - Kidney | Medium - Stool  | <0.0001 |
|              |                 | Medium - Tank   | <0.0001 |
|              | Medium - Liver  | Medium - Stool  | 0.0013  |
|              | High - Body     | High - GIT      | 0.0003  |
|              |                 | High - Stool    | <0.0001 |
|              | High - Digit    | High - Stool    | <0.0001 |
|              | High - GIT      | High - Kidney   | 0.01    |
|              |                 | High - Liver    | 0.0002  |
|              |                 | High - Stool    | <0.0001 |
|              |                 | High - Tank     | <0.0001 |
|              | High - Kidney   | High - Stool    | 0.0002  |
|              | High - Liver    | High - Stool    | <0.0001 |
|              | High - Stool    | High - Tank     | <0.0001 |
|              | Low - Stool     | Medium - Stool  | <0.0001 |
|              |                 | High - Stool    | <0.0001 |
|              | Low - Tank      | Medium - Tank   | <0.0001 |
|              |                 | High - Tank     | <0.0001 |
|              | Medium - Tank   | High - Tank     | <0.0001 |

| Fixed effect        | -                     | -                     | p value |
|---------------------|-----------------------|-----------------------|---------|
| Sample   Dose   Day | Day 2 - Medium Digit  | Day 2 - Medium GIT    | 0.0006  |
|                     |                       | Day 2 - Medium Kidney | 0.008   |
|                     |                       | Day 2 - Medium Tank   | 0.0256  |
|                     | Day 2 - High Body     | Day 2 - High Liver    | 0.0002  |
|                     |                       | Day 2 - High Stool    | 0.0331  |
|                     | Day 2 - High Digit    | Day 2 - High Liver    | 0.0002  |
|                     |                       | Day 2 - High Stool    | 0.0313  |
|                     | Day 2 - High GIT      | Day 2 - High Liver    | 0.0008  |
|                     | Day 2 - High Kidney   | Day 2 - High Tank     | 0.004   |
|                     | Day 2 - High Liver    | Day 2 - High Tank     | <0.0001 |
|                     | Day 2 - High Stool    | Day 2 - High Tank     | 0.0012  |
|                     | Day 4 - Low Body      | Day 4 - Low Tank      | 0.0197  |
|                     | Day 4 - Low Digit     | Day 4 - Low Tank      | 0.0065  |
|                     | Day 4 - Low GIT       | Day 4 - Low Liver     | 0.025   |
|                     |                       | Day 4 - Low Stool     | 0.0045  |
|                     |                       | Day 4 - Low Tank      | <0.0001 |
|                     | Day 4 - Low Kidney    | Day 4 - Low Tank      | 0.0021  |
|                     | Day 4 - Low Liver     | Day 4 - Low Tank      | 0.007   |
|                     | Day 4 - Medium Body   | Day 4 - Medium GIT    | 0.0109  |
|                     |                       | Day 4 - Medium Liver  | 0.0304  |
|                     | Day 4 - Medium GIT    | Day 4 - Medium Digit  | 0.0034  |
|                     |                       | Day 4 - Medium Stool  | <0.0001 |
|                     |                       | Day 4 - Medium Tank   | <0.0001 |
|                     | Day 4 - Medium Kidney | Day 4 - Medium Stool  | <0.0001 |
|                     |                       | Day 4 - Medium Tank   | 0.0002  |
|                     | Day 4 - Medium Liver  | Day 4 - Medium Stool  | <0.0001 |
|                     |                       | Day 4 - Medium Tank   | 0.0006  |
|                     | Day 4 - High GIT      | Day 4 - High Body     | 0.0003  |
|                     |                       | Day 4 - High Digit    | 0.0064  |
|                     |                       | Day 4 - High Kidney   | 0.0054  |
|                     |                       | Day 4 - High Stool    | <0.0001 |
|                     |                       | Day 4 - High Tank     | <0.0001 |
|                     | Day 4 - High Liver    | Day 4 - High Stool    | 0.023   |
|                     | Day 6 - Medium Body   | Day 6 - Medium Stool  | <0.0001 |

| Fixed effect | -                     | -                    | p value |
|--------------|-----------------------|----------------------|---------|
|              | Day 6 - Medium Digit  | Day 6 - Medium Stool | <0.0001 |
|              | Day 6 - Medium GIT    | Day 6 - Medium Stool | <0.0001 |
|              | Day 6 - Medium Kidney | Day 6 - Medium Stool | <0.0001 |
|              |                       | Day 6 - Medium Tank  | 0.0002  |
|              | Day 6 - Medium Liver  | Day 6 - Medium Stool | <0.0001 |
|              |                       | Day 6 - Medium Tank  | 0.001   |
|              | Day 6 - High Body     | Day 6 - High GIT     | 0.0058  |
|              |                       | Day 6 - High Kidney  | 0.0004  |
|              |                       | Day 6 - High Liver   | 0.0064  |
|              |                       | Day 6 - High Stool   | <0.0001 |
|              | Day 6 - High Digit    | Day 6 - High Stool   | <0.0001 |
|              |                       | Day 6 - High Tank    | 0.005   |
|              | Day 6 - High GIT      | Day 6 - High Stool   | <0.0001 |
|              |                       | Day 6 - High Tank    | <0.0001 |
|              | Day 6 - High Kidney   | Day 6 - High Stool   | <0.0001 |
|              |                       | Day 6 - High Tank    | <0.0001 |
|              | Day 6 - High Liver    | Day 6 - High Stool   | <0.0001 |
|              |                       | Day 6 - High Tank    | <0.0001 |
|              | Day 2 - Low Stool     | Day 2 - High Stool   | 0.0171  |
|              | Day 4 - Low Stool     | Day 4 - High Stool   | 0.0109  |
|              | Day 6 - Low Stool     | Day 6 - Medium Stool | 0.0095  |
|              |                       | Day 6 - High Stool   | <0.0001 |
|              | Day 2 - Low Tank      | Day 2 - Medium Tank  | 0.0095  |
|              |                       | Day 2 - High Tank    | <0.0001 |
|              | Day 2 - Medium Tank   | Day 2 - High Tank    | <0.0001 |
|              | Day 4 - Low Tank      | Day 4 - Medium Tank  | 0.0003  |
|              |                       | Day 4 - High Tank    | <0.0001 |
|              | Day 6 - Low Tank      | Day 6 - Medium Tank  | 0.0001  |
|              |                       | Day 6 - High Tank    | <0.0001 |

**Table S8.** Clinical signs observed in frogs for the duration of the experiment.

| Treatment | Frog   | Sign                                     | Days post-exposure |
|-----------|--------|------------------------------------------|--------------------|
| Control   | A4/1/1 |                                          |                    |
|           | A4/1/2 |                                          |                    |
|           | A4/1/3 |                                          |                    |
|           | A4/1/4 |                                          |                    |
|           | A4/1/5 |                                          |                    |
|           | A4/1/6 |                                          |                    |
|           | B4/1   |                                          |                    |
|           | A4/2/1 |                                          |                    |
|           | A4/2/2 |                                          |                    |
|           | A4/2/3 |                                          |                    |
|           | A4/2/4 | Red skin on stomach                      | 4                  |
|           | A4/2/5 |                                          |                    |
|           | A4/2/6 |                                          |                    |
|           | B4/2   |                                          |                    |
|           | A4/3/1 |                                          |                    |
|           | A4/3/2 |                                          |                    |
|           | A4/3/3 |                                          |                    |
|           | A4/3/4 |                                          |                    |
|           | A4/3/5 |                                          |                    |
|           | A4/3/6 |                                          |                    |
|           | B4/3   |                                          |                    |
| Low       | B3/1/1 |                                          |                    |
|           | B3/1/2 |                                          |                    |
|           | B3/1/3 | Red Cloaca                               | 2                  |
|           | B3/1/4 |                                          |                    |
|           | B3/1/5 |                                          |                    |
|           | B3/1/6 |                                          |                    |
|           | B3/1/7 | Red thighs                               | 2                  |
|           | B3/2/1 | Loss of appetite                         | 4                  |
|           | B3/2/2 |                                          |                    |
|           | B3/2/3 | Prolapsed cloaca<br>Redness on right arm | 4                  |
|           | B3/2/4 |                                          |                    |
|           | B3/2/5 |                                          |                    |
|           | B3/2/6 |                                          |                    |
|           | B3/2/7 |                                          |                    |
|           | B3/3/1 |                                          |                    |
|           | B3/3/2 |                                          |                    |
|           | B3/3/3 |                                          |                    |
|           | B3/3/4 |                                          |                    |
|           | B3/3/5 | Redness of arms and digits               | 6                  |
|           | B3/3/6 |                                          |                    |
|           | B3/3/7 |                                          |                    |
| Medium    | B2/1/1 |                                          |                    |
|           | B2/1/2 |                                          |                    |
|           | B2/1/3 |                                          |                    |
|           | B2/1/4 |                                          |                    |
|           | B2/1/5 |                                          |                    |
|           | B2/1/6 |                                          |                    |
|           | B2/1/7 |                                          |                    |
|           | B2/2/1 |                                          |                    |
|           | B2/2/2 |                                          |                    |
|           | B2/2/3 | Redness near right eye                   | 4                  |
|           | B2/2/4 | Sitting lethargically                    | 3                  |
|           |        | Prolapsed cloaca                         | 4                  |
|           |        | H. top of left leg                       |                    |
|           | B2/2/5 | Swelling at Cloaca                       | 3                  |
|           | B2/2/6 |                                          |                    |
|           | B2/2/7 |                                          |                    |
|           | B2/3/1 | Swollen stomach<br>Redness on feet       | 6                  |
|           |        | Leg erythema                             |                    |
|           | B2/3/2 | Lip erythema                             | 6                  |

| Treatment | Frog   | Sign                              | Days post-exposure |
|-----------|--------|-----------------------------------|--------------------|
| Medium    | B2/3/3 | Leg erythema                      | 6                  |
|           |        | Swollen stomach                   |                    |
|           |        | Redness on upper right arm        |                    |
|           | B2/3/4 | Lip erythema                      | 6                  |
|           |        | Lip erythema                      |                    |
|           | B2/3/5 | Leg erythema                      | 6                  |
|           | B2/3/6 | Red tongue                        | 6                  |
|           |        | Redness on lower abdomen and feet |                    |
| B2/3/7    |        |                                   |                    |
| High      | B1/1/1 |                                   |                    |
|           | B1/1/2 |                                   |                    |
|           | B1/1/3 |                                   |                    |
|           | B1/1/4 | Loss of appetite                  | 2                  |
|           | B1/1/5 |                                   |                    |
|           | B1/1/6 |                                   |                    |
|           | B1/1/7 |                                   |                    |
|           | B1/2/1 | Loss of appetite                  | 4                  |
|           | B1/2/2 |                                   |                    |
|           | B1/2/3 |                                   |                    |
|           | B1/2/4 | Red digits                        | 4                  |
|           | B1/2/5 | Loss of appetite                  | 3                  |
|           |        | Bleeding cloaca                   | 4                  |
|           | B1/2/6 | Loss of appetite                  | 4                  |
|           |        | Red tongue                        | 4                  |
|           | B1/2/7 | Red tongue                        | 4                  |
|           | B1/3/1 | Loss of appetite                  | 4                  |
|           |        | Red digits                        | 6                  |
|           |        | Red mouth                         |                    |
|           | B1/3/2 | Loss of appetite                  | 4                  |
|           |        | Bloated stomach                   | 5                  |
|           |        | MORT                              |                    |
|           |        | Single red digit                  | 6                  |
|           |        | Red cloaca                        |                    |
|           | B1/3/3 | Loss of appetite                  | 4                  |
|           |        | Leg erythmia                      | 6                  |
|           |        | Lip erythmia                      |                    |
|           | B1/3/4 |                                   |                    |
|           | B1/3/5 | Loss of appetite                  | 4                  |
|           |        | Leg erythmia                      | 6                  |
|           |        | Lip erythmia                      |                    |
|           | B1/3/6 | Loss of appetite                  | 4                  |
|           | B1/3/7 | Red left eye                      | 6                  |



**Table S9.** Mixed effects model p-values for fixed effects and their interactions in toads. An effect is deemed significant if p-value is <0.05.

| Fixed effect     | -                      | -                     | p value |
|------------------|------------------------|-----------------------|---------|
| Virus            | CMTV                   | FV3                   | 0.1236  |
| Day              | Day 4                  | Day 6                 | 1       |
|                  |                        | Day 8                 | 0.3607  |
|                  | Day 6                  | Day 8                 | 1       |
| Sample           | Buccal                 | Digit                 | <0.0001 |
|                  |                        | GIT                   | <0.0001 |
|                  |                        | Leg                   | <0.0001 |
|                  |                        | Liver                 | <0.0001 |
|                  |                        | Tank                  | <0.0001 |
|                  | GIT                    | Leg                   | 0.0013  |
|                  |                        | Liver                 | 0.0042  |
|                  |                        | Tank                  | 0.0336  |
|                  |                        |                       |         |
| Virus*Sample     | CMTV - Buccal          | CMTV - Digit          | 0.0001  |
|                  |                        | CMTV - GIT            | 0.023   |
|                  |                        | CMTV - Leg            | 0.017   |
|                  |                        | CMTV - Liver          | <0.0001 |
|                  |                        | CMTV - Tank           | 0.0001  |
|                  | FV3 - Buccal           | FV3 - Digit           | 0.0007  |
|                  |                        | FV3 - GIT             | 0.0024  |
|                  |                        | FV3 - Leg             | <0.0001 |
|                  |                        | FV3 - Liver           | <0.0001 |
|                  |                        | FV3 - Tank            | <0.0001 |
|                  |                        | CMTV - Leg            | 0.0151  |
|                  |                        |                       |         |
|                  |                        |                       |         |
|                  |                        |                       |         |
| Sample Day Virus | CMTV - Day 6<br>Buccal | CMTV - Day 6<br>Digit | 0.0068  |
|                  |                        | CMTV - Day 6<br>Leg   | 0.0068  |
|                  |                        | CMTV - Day 6<br>Liver | 0.0068  |
|                  |                        | CMTV - Day 6<br>Tank  | 0.0068  |
|                  |                        |                       |         |
|                  | CMTV - Day 8<br>Buccal | CMTV - Day 8<br>Digit | 0.0055  |
|                  |                        | CMTV - Day 8<br>Leg   | <0.0001 |
|                  |                        | CMTV - Day 8<br>Tank  | 0.0043  |
|                  |                        |                       |         |
|                  |                        |                       |         |
|                  | CMTV - Day 8<br>GIT    | CMTV - Day 8<br>Leg   | 0.0028  |
|                  |                        |                       |         |
|                  | CMTV - Day 8<br>Leg    | CMTV - Day 8<br>Liver | 0.002   |
|                  |                        |                       |         |
|                  | FV3 - Day 4<br>Buccal  | FV3 - Day 4<br>GIT    | 0.0047  |
|                  |                        |                       |         |
|                  |                        | FV3 - Day 4<br>Leg    | 0.0047  |
|                  |                        | FV3 - Day 4<br>Liver  | 0.0047  |
|                  |                        | FV3 - Day 4<br>Tank   | 0.0047  |
|                  |                        |                       |         |
|                  |                        |                       |         |
|                  | FV3 - Day 6<br>Buccal  | FV3 - Day 6<br>Liver  | 0.008   |
|                  |                        | FV3 - Day 6<br>Tank   | 0.0022  |
|                  |                        |                       |         |
|                  | FV3 - Day 6<br>GIT     | FV3 - Day 6<br>Tank   | 0.0165  |
|                  |                        |                       |         |
|                  | FV3 - Day 8<br>Buccal  | FV3 - Day 8<br>Digit  | 0.0022  |
|                  |                        | FV3 - Day 8<br>Leg    | 0.0001  |
|                  |                        | FV3 - Day 8<br>Liver  | <0.0001 |
|                  |                        | FV3 - Day 8<br>Tank   | 0.0002  |
|                  |                        |                       |         |
|                  | FV3 - Day 8<br>GIT     | FV3 - Day 8<br>Leg    | 0.019   |
|                  |                        | FV3 - Day 8<br>Liver  | 0.001   |

**Table S10.** Clinical signs observed in toads for the duration of the experiment.

| Treatment | Toad | Gender | Sign                                 | Day post-exposure |
|-----------|------|--------|--------------------------------------|-------------------|
| Control   | C1/1 | Male   |                                      |                   |
|           | C1/2 | Male   |                                      |                   |
|           | C1/3 | Male   |                                      |                   |
|           | C2/1 | Female | Red left digit                       | 6                 |
|           | C2/2 | Female |                                      |                   |
|           | C2/3 | Female |                                      |                   |
|           | C3/1 | Male   | v. slight redness on foot (right)    | 6                 |
|           | C3/2 | Female |                                      |                   |
|           | C3/3 | Male   | Red spots on roof of mouth           | 8                 |
| RUK13     | R1/1 | Male   |                                      |                   |
|           | R1/2 | Female |                                      |                   |
|           | R1/3 | Male   |                                      |                   |
|           | R1/4 | Male   |                                      |                   |
|           | R1/5 | Male   |                                      |                   |
|           | R1/6 | Female |                                      |                   |
|           | R1/7 | Male   |                                      |                   |
|           |      |        | Spots on roof/back of mouth          |                   |
|           |      |        | Red spotty tongue                    | 6                 |
|           | R2/1 | Female | Red eye (right)                      |                   |
|           |      |        | Red spot on tongue/ reddened at base | 6                 |
|           | R2/2 | Male   |                                      |                   |
|           | R2/3 | Female |                                      |                   |
|           | R2/4 | Female |                                      |                   |
|           | R2/5 | Male   |                                      |                   |
|           | R2/6 | Female |                                      |                   |
|           | R2/7 | Female |                                      |                   |
|           | R3/1 | Male   | Gaping                               | 7                 |
|           |      |        | Red tongue                           | 8                 |
|           | R3/2 | Male   | x1 cricket (inappetance)             | 3                 |
|           |      |        | Red webbing (right foot)             |                   |
|           |      |        | red tongue                           |                   |
|           |      |        | red leg (right and bit on left)      | 8                 |
|           |      |        | haemorrhage                          |                   |
|           | R3/3 | Female | Spotty tongue                        | 8                 |
|           | R3/4 | Female |                                      |                   |
|           | R3/5 | Female |                                      |                   |
|           | R3/6 | Female |                                      |                   |
|           | R3/7 | Female | lip erythema                         | 6                 |
| PDE18     | P1/1 | Female |                                      |                   |
|           | P1/2 | Male   |                                      |                   |
|           | P1/3 | Male   |                                      |                   |
|           | P1/4 | Male   |                                      |                   |
|           | P1/5 | Male   |                                      |                   |
|           | P1/6 | Female |                                      |                   |
|           | P1/7 | Female |                                      |                   |
|           | P2/1 | Female |                                      |                   |
|           | P2/2 | Female |                                      |                   |
|           | P2/3 | Female |                                      |                   |
|           | P2/4 | Female |                                      |                   |
|           | P2/5 | Male   | Red tongue                           | 6                 |
|           | P2/6 | Female |                                      |                   |
|           | P2/7 | Female |                                      |                   |
|           | P3/1 | Female | Spotty tongue                        |                   |
|           | P3/2 | Male   | x1 (inappetance)                     |                   |
|           | P3/3 | Female | x2 (inappetance)                     |                   |
|           | P3/4 | Female |                                      |                   |
|           | P3/5 | Male   | Lethargic                            | 2                 |
|           |      |        | Red spotted tongue                   | 8                 |
|           | P3/6 | Male   | Red abdomen and upper legs           | 8                 |
|           | P3/7 | Female |                                      |                   |

**Table S11.** Zero-inflated Gaussian Mixed effects model outputs for viral quantity in *R. temporaria* (Quantity ~ Sample\*Day\*Dose + (1|Frog)) p-values for fixed effects and their interactions in buccal, body and tank swabs, along with toe clips, stool, liver, GIT and kidney tissue. An effect is deemed significant if p-value is <0.05. Only the interactions of Sample\*Day\*Dose are shown below.

| Fixed effect interactions |                            | P value | Fixed effect interactions |                            | P value |
|---------------------------|----------------------------|---------|---------------------------|----------------------------|---------|
| Day 4 – Low<br>Body       | Day 4 – Low<br>Buccal      | 0.0293  | Day 4 – Medium<br>GIT     | Day 4 – Medium<br>Stool    | <0.0001 |
|                           | Day 4 – Low<br>Toe clip    | 0.0465  |                           | Day 4 – Medium<br>Toe clip | <0.0001 |
|                           | Day 4 – Low<br>Tank        | 0.0465  |                           | Day 4 – Medium<br>Tank     | <0.0001 |
| Day 4 – Low<br>Buccal     | Day 4 – Low<br>Liver       | 0.0110  | Day 4 – Medium<br>Kidney  | Day 4 – Medium<br>Stool    | <0.0001 |
|                           | Day 4 – Low<br>Stool       | 0.0009  |                           | Day 4 – Medium<br>Toe clip | 0.0044  |
|                           | Day 4 – Low<br>Toe clip    | <0.0001 |                           | Day 4 – Medium<br>Tank     | 0.0007  |
|                           | Day 4 – Low<br>Tank        | <0.0001 | Day 4 – Medium<br>Liver   | Day 4 – Medium<br>Stool    | 0.0001  |
| Day 4 – Low<br>GIT        | Day 4 – Low<br>Stool       | 0.0123  |                           | Day 4 – Medium<br>Toe clip | 0.0128  |
|                           | Day 4 – Low<br>Toe clip    | 0.0002  |                           | Day 4 – Medium<br>Tank     | 0.0023  |
|                           | Day 4 – Low<br>Tank        | 0.0002  | Day 6 – Medium<br>Body    | Day 6 – Medium<br>Stool    | 0.0001  |
| Day 4 – Low<br>Kidney     | Day 4 – Low<br>Toe clip    | 0.0053  | Day 6 – Medium<br>Buccal  | Day 6 – Medium<br>Stool    | <0.0001 |
|                           | Day 4 – Low<br>Tank        | 0.0053  |                           | Day 6 – Medium<br>Toe clip | 0.0247  |
| Day 4 – Low<br>Liver      | Day 4 – Low<br>Toe clip    | 0.0180  |                           | Day 6 – Medium<br>Tank     | 0.0026  |
|                           | Day 4 – Low<br>Tank        | 0.0180  | Day 6 – Medium<br>Digit   | Day 6 – Medium<br>Stool    | 0.0002  |
| Day 2 – Medium<br>Buccal  | Day 2 – Medium<br>Digit    | 0.0151  | Day 6 – Medium<br>GIT     | Day 6 – Medium<br>Stool    | <0.0001 |
|                           | Day 2 – Medium<br>Toe clip | 0.0151  |                           | Day 6 – Medium<br>Toe clip | 0.0168  |
| Day 2 – Medium<br>Digit   | Day 2 – Medium<br>GIT      | 0.0021  |                           | Day 6 – Medium<br>Tank     | 0.0017  |
|                           | Day 2 – Medium<br>Kidney   | 0.0289  | Day 6 – Medium<br>Kidney  | Day 6 – Medium<br>Stool    | <0.0001 |
| Day 2 – Medium<br>GIT     | Day 2 – Medium<br>Toe clip | 0.0021  |                           | Day 6 – Medium<br>Toe clip | 0.0093  |
|                           | Day 2 – Medium<br>Toe clip | 0.0289  |                           | Day 6 – Medium<br>Tank     | 0.0010  |
| Day 4 – Medium<br>Body    | Day 4 – Medium<br>GIT      | 0.0001  | Day 6 – Medium<br>Liver   | Day 6 – Medium<br>Stool    | <0.0001 |
|                           | Day 4 – Medium<br>Kidney   | 0.0353  |                           | Day 6 – Medium<br>Toe clip | 0.0341  |
| Day 4 – Medium<br>Buccal  | Day 4 – Medium<br>Stool    | 0.0003  |                           | Day 6 – Medium<br>Tank     | 0.0037  |
|                           | Day 4 – Medium<br>Toe clip | 0.0284  | Day 2 – High<br>Body      | Day 2 – High<br>Liver      | 0.0010  |
|                           | Day 4 – Medium<br>Tank     | 0.0056  |                           | Day 2 – High<br>Toe clip   | 0.0036  |
| Day 4 – Medium<br>Digit   | Day 4 – Medium<br>GIT      | 0.0121  |                           |                            |         |

| Fixed effect interactions |                          | P<br>value |
|---------------------------|--------------------------|------------|
| Day 2 – High<br>Buccal    | Day 2 – High<br>Kidney   | 0.0025     |
|                           | Day 2 – High<br>Liver    | <0.0001    |
|                           | Day 2 – High<br>Stool    | 0.0005     |
|                           | Day 2 – High<br>Toe clip | <0.0001    |
| Day 2 – High<br>Digit     | Day 2 – High<br>Liver    | 0.0013     |
|                           | Day 2 – High<br>Toe clip | 0.0046     |
| Day 2 – High<br>GIT       | Day 2 – High<br>Liver    | 0.0050     |
|                           | Day 2 – High<br>Toe clip | 0.0078     |
| Day 2 – High<br>Kidney    | Day 2 – High<br>Tank     | 0.0178     |
| Day 2 – High<br>Liver     | Day 2 – High<br>Tank     | <0.0001    |
| Day 2 – High<br>Stool     | Day 2 – High<br>Tank     | 0.0043     |
| Day 2 – High<br>Toe clip  | Day 2 – High<br>Tank     | <0.0001    |
| Day 4 – High<br>Body      | Day 4 – High<br>Buccal   | 0.0028     |
|                           | Day 4 – High<br>GIT      | 0.0010     |
| Day 4 – High<br>Buccal    | Day 4 – High<br>Digit    | 0.0366     |
|                           | Day 4 – High<br>Kidney   | 0.0239     |
|                           | Day 4 – High<br>Stool    | <0.0001    |
|                           | Day 4 – High<br>Tank     | 0.0001     |
| Day 4 – High<br>Digit     | Day 4 – High<br>GIT      | 0.0200     |
| Day 4 – High<br>GIT       | Day 4 – High<br>Kidney   | 0.0151     |
|                           | Day 4 – High<br>Stool    | <0.0001    |
|                           | Day 4 – High<br>Tank     | <0.0001    |

| Fixed effect interactions |                          | P<br>value |
|---------------------------|--------------------------|------------|
| Day 6 – High<br>Body      | Day 6 – High<br>GIT      | 0.0182     |
|                           | Day 6 – High<br>Kidney   | 0.0016     |
|                           | Day 6 – High<br>Liver    | 0.0200     |
|                           | Day 6 – High<br>Stool    | 0.0001     |
|                           | Day 6 – High<br>Toe clip | 0.0103     |
|                           | Day 6 – High<br>Buccal   | <0.0001    |
|                           | Day 6 – High<br>Stool    | 0.0001     |
|                           | Day 6 – High<br>Tank     | 0.0001     |
| Day 6 – High<br>Digit     | Day 6 – High<br>Stool    | <0.0001    |
|                           | Day 6 – High<br>Tank     | 0.0158     |
| Day 6 – High<br>GIT       | Day 6 – High<br>Stool    | <0.0001    |
|                           | Day 6 – High<br>Tank     | <0.0001    |
| Day 6 – High<br>Kidney    | Day 6 – High<br>Stool    | <0.0001    |
|                           | Day 6 – High<br>Tank     | <0.0001    |
| Day 6 – High<br>Liver     | Day 6 – High<br>Stool    | <0.0001    |
|                           | Day 6 – High<br>Tank     | <0.0001    |
| Day 6 – High<br>Stool     | Day 6 – High<br>Tank     | <0.0001    |
|                           | Day 6 – High<br>Tank     | <0.0001    |
| Day 6 – High<br>Toe clip  | Day 6 – High<br>Tank     | <0.0001    |
|                           | Day 6 – High<br>Tank     | <0.0001    |

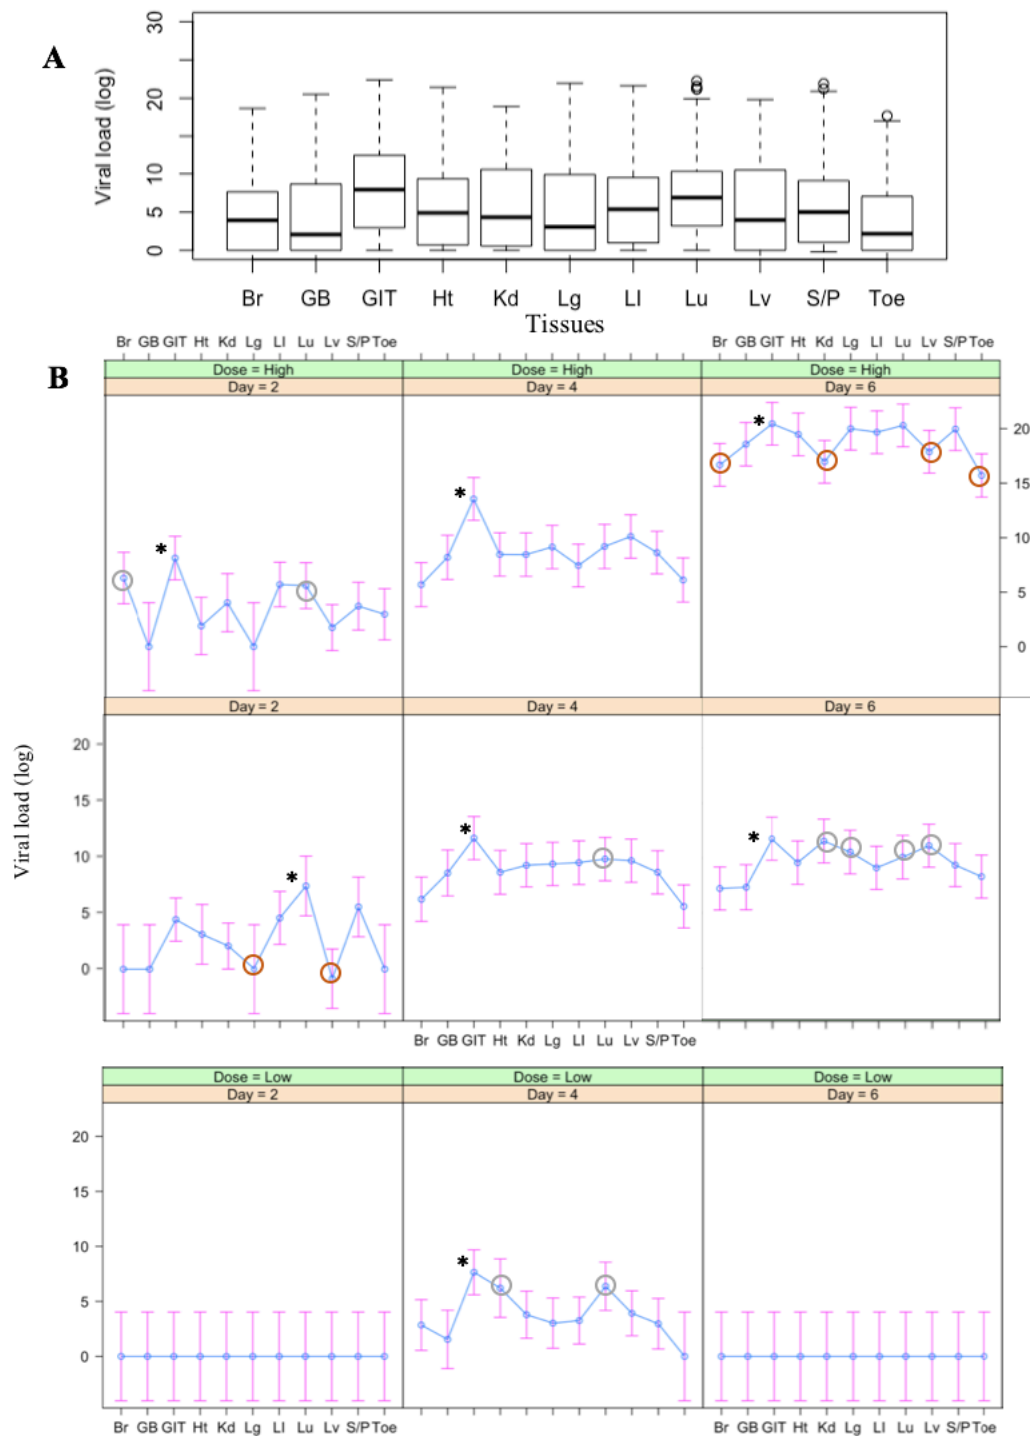

**Figure S1.** Predicted probabilities of viral load in *R.temporaria* generated from the zero inflated gaussian mixed model for A) tissue as a single factor and, B) tissue\*day\*dose as interactions. Br=brain, GB=gall bladder, GIT=gastro-intestinal tract, Ht=heart, Kd=kidney, Lg=leg muscle, LI=large intestine, Lu=lung, Lv=liver, S/P=spleen/pancreas, Toe=toe clip. \* indicates a tissue with significantly higher viral loads than either tissue ringed in red, or all tissues not ringed in grey.

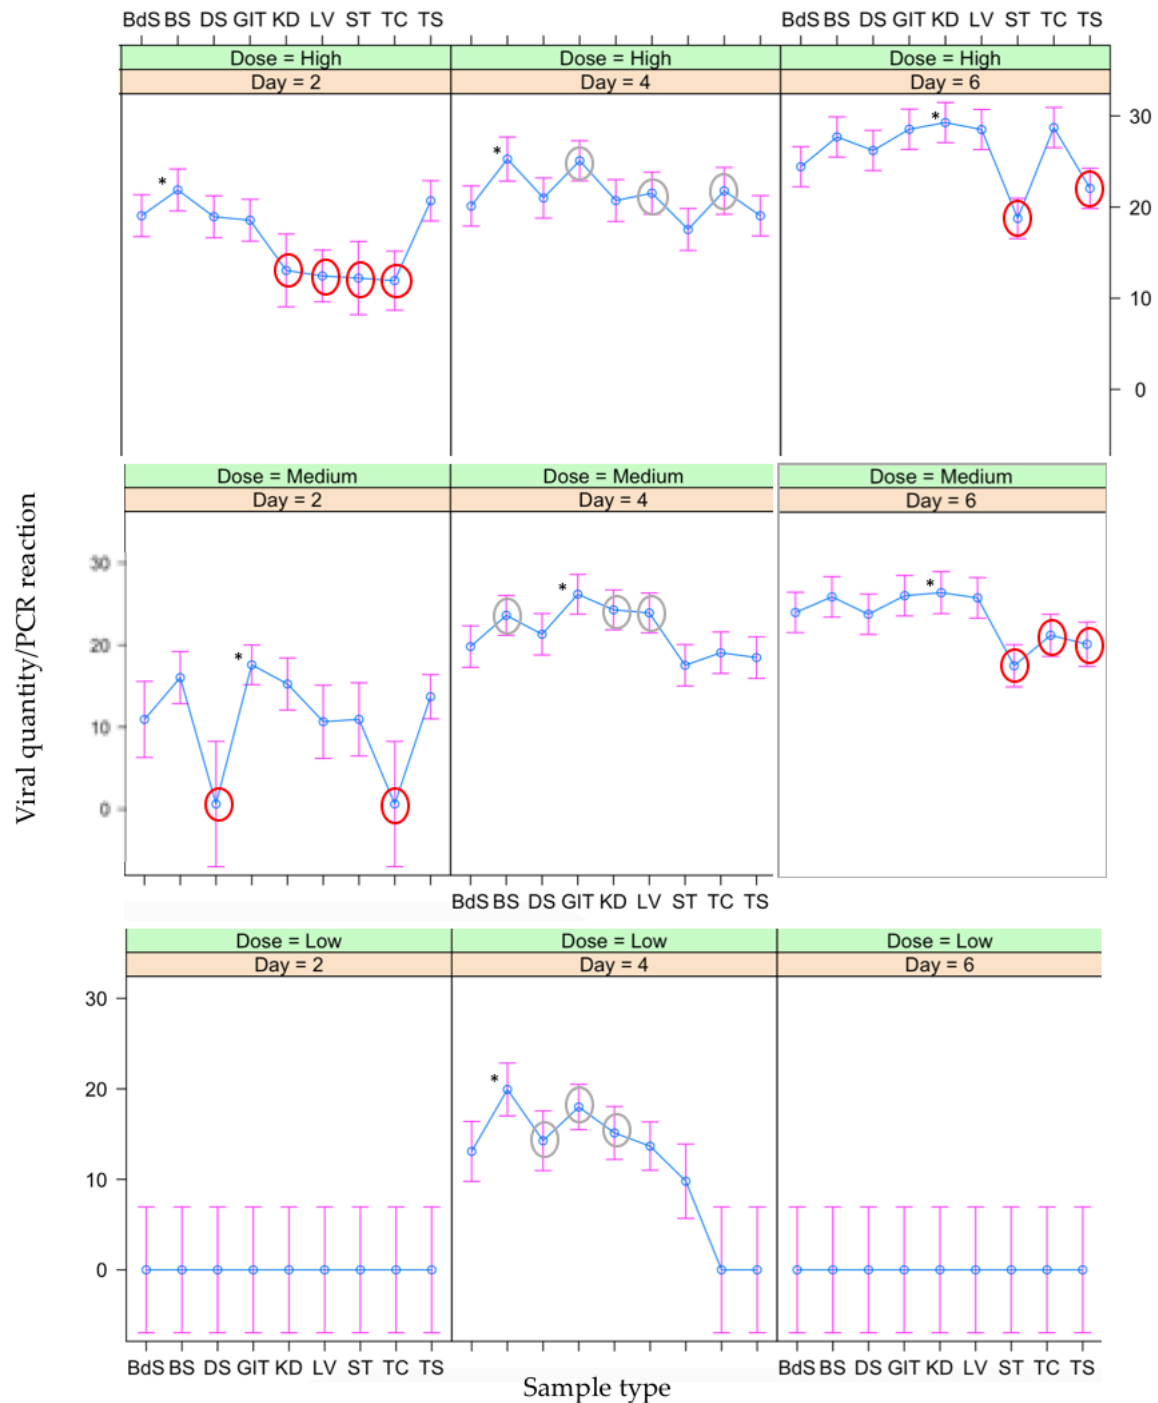

**Figure S2.** Predicted probabilities of ranavirus quantity/PCR reaction in *R. temporaria* generated from the zero inflated gaussian mixed model for sample\*day\*dose as interactions. BdS=body swab, BS=buccal swab, DS=digit swab, GIT=gastro-intestinal tract, Kd=kidney, Lv=liver, ST=stool, TC=toe clip, TS=tank swab. \* indicates a sample with significantly higher quantities or virus than either tissue ringed in red, or all tissues not ringed in grey.

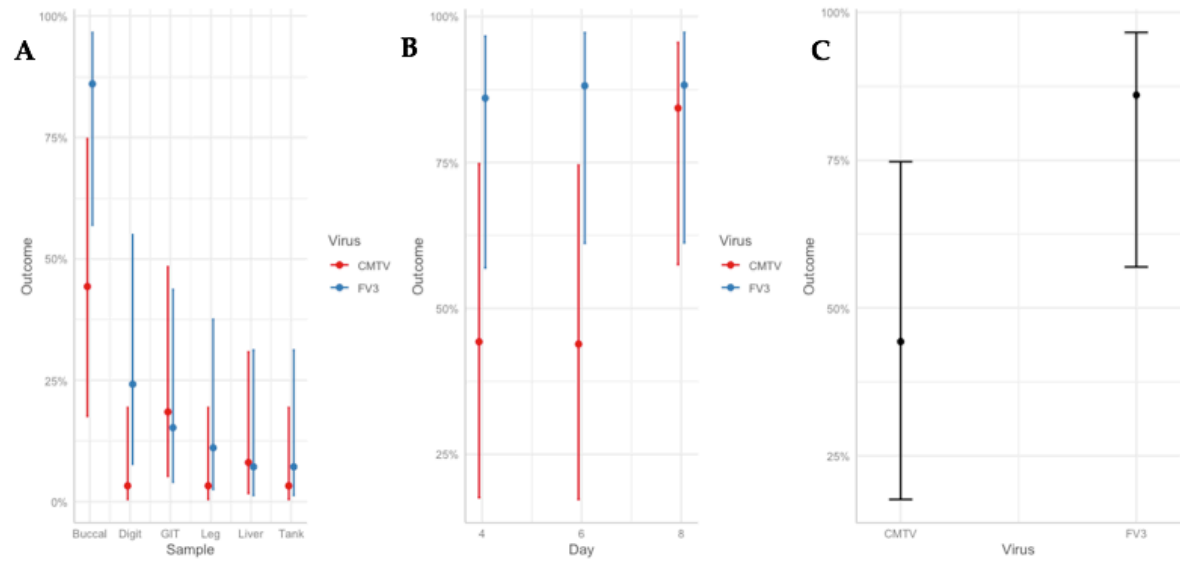

**Figure S3.** Predicted probabilities of outcome generated from generalised linear mixed effects model of toads for a) sample type with virus, b) virus with day and c) virus only.

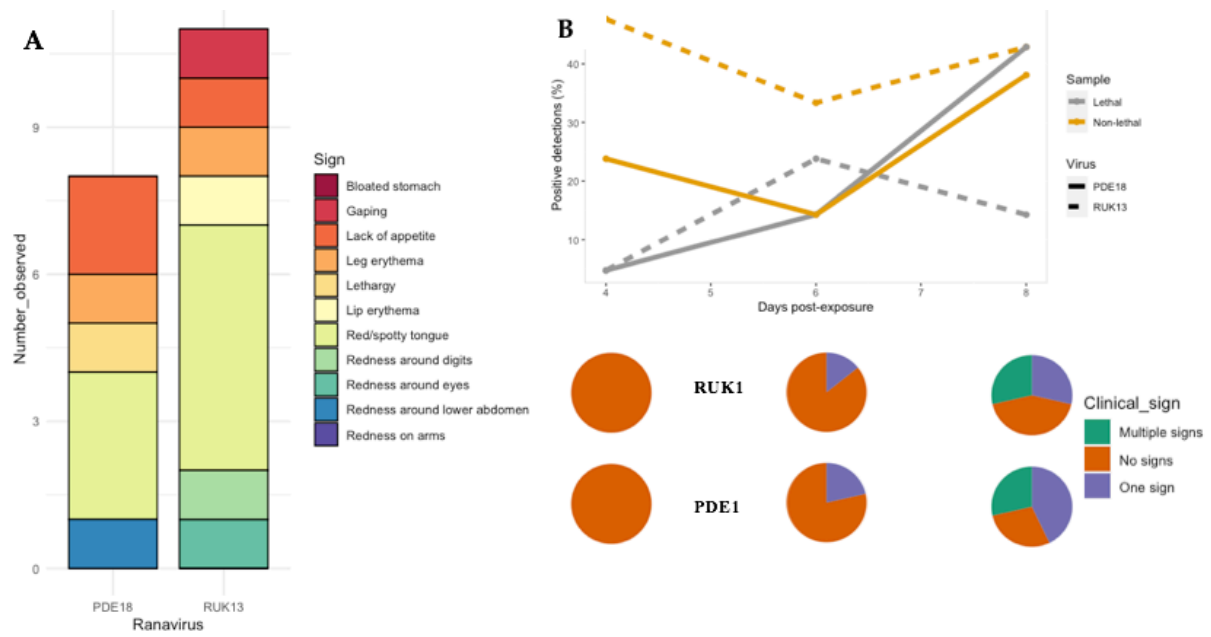

**Figure S4.** Clinical signs observed in *B.bufo* for both ranavirus treatment groups; a) in total, and b) by individual on sampling days compared to detectability of ranaviruses in non-lethal vs lethal samples.
